Title: Canine transmissible venereal tumor genome reveals ancient introgression from coyotes to arctic sled dogs

Xuan Wang<sup>1,2§</sup>, Bo-Wen Zhou<sup>1,2§</sup>, Ting-Ting Yin<sup>1,2</sup>, Fang-Liang Chen<sup>3</sup>, Ali Esmailizadeh<sup>4</sup>, Melissa M. Turner<sup>5</sup>, Andrei D. Poyarkov<sup>6</sup>, Peter Savolainen<sup>7</sup>, Guo-Dong Wang<sup>1,2,8\*</sup>, Qiaomei Fu<sup>9,10\*</sup>, Ya-Ping Zhang<sup>1,2,8\*</sup>

<sup>1</sup>State Key Laboratory of Genetic Resources and Evolution, Kunming Institute of Zoology, Chinese Academy of Sciences, Kunming, 650223, China

<sup>2</sup>Kunming College of Life Science, University of Chinese Academy of Sciences, Kunming, 650223, China

<sup>3</sup>Kunming Police Dog Base of the Ministry of Public Security, Kunming, 650204, China

<sup>4</sup>Department of Animal Science, Faculty of Agriculture, Shahid Bahonar University of Kerman, Kerman, PB 76169-133, Iran

<sup>5</sup>Department of Forestry and Environmental Resources, Fisheries, Wildlife, and Conservation Biology Program, North Carolina State University, Raleigh, NC 27695, USA

<sup>6</sup>Severtsov Institute of Ecology and Evolution, Russian Academy of Science, Leninskiy prospect, 33, Moscow, 119071, Russia

<sup>7</sup>Department of Gene Technology, KTH-Royal Institute of Technology, Science for Life Laboratory, Tomtebodavägen 23A, Solna, 17165, Sweden

<sup>8</sup>Center for Excellence in Animal Evolution and Genetics, Chinese Academy of Sciences, Kunming, 650223, China

<sup>9</sup>Key Laboratory of Vertebrate Evolution and Human Origins of Chinese Academy of Sciences, IVPP, CAS, Beijing, 100044, China

<sup>10</sup>Center for Excellence in Life and Paleoenvironment, Chinese Academy of Sciences, Beijing, 100044, China

<sup>§</sup>Contributed equally.

\*Correspondence: Guo-Dong Wang<sup>a</sup>, Qiaomei Fu<sup>b</sup>, or Ya-Ping Zhang<sup>c</sup>

<sup>a</sup>E-mail: wanggd@mail.kiz.ac.cn;

<sup>b</sup>E-mail: fuqiaomei@ivpp.ac.cn;

<sup>c</sup>E-mail: zhangyp@mail.kiz.ac.cn

38 Dear Editor,

39 Ancient genome-sequencing studies have extensively refined our understanding of the  
 40 genetic histories and adaptive evolution of humans<sup>1</sup>, as well as the domestic process  
 41 of livestock and crops<sup>2</sup>. Recent studies about ancient and modern canids all indicate  
 42 that canids have intricate histories, and lots of canine populations disappeared during  
 43 evolution<sup>3-6</sup>. Thus, ancient genomes from canine fossils are in high demand to clarify  
 44 canine evolution and the processes leading to dog domestication. Canine transmissible  
 45 venereal tumor (CTVT), the oldest known somatic cell line, is a living fossil,  
 46 originating from cancer cells transmitted from a host to other canids during the mating  
 47 process<sup>7</sup>. Clonal origin analyses hints that the original dog infected with CTVT  
 48 (CTVT founder) came from an ancient sled dog or wolf population<sup>7-9</sup>. However, the  
 49 genetic composition of the CTVT founder is still not clear.

50

51 In order to explore this issue, we applied whole genome sequencing (WGS) to two  
 52 CTVT samples, their corresponding hosts, and 24 additional canids (Supplementary  
 53 Note). Combined with published WGS data of two CTVT samples and high quality  
 54 canine WGS data, we constructed a data set containing WGS data of four CTVT  
 55 samples a 169-individual reference panel composed of worldwide gray wolves (*Canis*  
 56 *lupus*), dogs (*Canis lupus familiaris*), coyotes (*Canis latrans*) and golden jackals  
 57 (*Canis aureus*) (Supplementary Note, Table S1).

58

59 We firstly developed a pipeline *transmissible tumor genotyper* to obtain the per-site

60 genotype for each tumor sample (Supplementary Note). All sites with the same  
61 genotype among four CTVT samples were used for ascertainment. Next, we  
62 successfully ascertained 18.9M biallelic single nucleotide polymorphisms (SNPs) for  
63 the CTVT common genotype using 24.5M SNPs from the reference panel  
64 (Supplementary Note). We denote these data Set A. SNPs from the CTVT data in set  
65 A could be treated as the founder's germline polymorphisms because they showed a  
66 typical germline mutation signature (Supplementary Note, Figure S5).

67  
68 We utilized population phylogeny analysis, principal component analysis (PCA) and  
69 outgroup  $f_3$  (X, CTVT founder; Outgroup) statistical analysis to assess the genetic  
70 relationship between the CTVT founder and modern samples in set A (Supplementary  
71 Note). Our results reveal that the CTVT founder was more closely related to  
72 present-day arctic sled dogs than to any other populations (Figure S6-8), in  
73 accordance with very recent results<sup>7,8</sup>. However, ADMIXTURE analysis showed that  
74 the CTVT founder also possessed an ancestral component found predominantly in  
75 non-dog populations, a result that we do not observe for any arctic sled dog  
76 (Supplementary Note, Figure 1A). Moreover, the CTVT founder did not cluster  
77 tightly with arctic sled dogs in the PCA analysis (Figure S7). These results imply that  
78 the CTVT founder belonged to a previously unknown arctic dog population that is not  
79 represented in the reference panel.

80

81 To further investigate whether the CTVT founder had introgression from a non-dog

82 population, we ascertained set A using the Andean fox (*Lycalopex culpaeus*) genome  
83 (Supplementary Note), forming set B. Next, we tested every non-dog group in set B  
84 as candidate introgressor using  $D$  statistics of the form  $D(\text{CTVT founder, Pop2;}$   
85 Introgressor, Andean Fox), where Pop2 was tested using all other present-day groups  
86 (Supplementary Note, Table S2). Only coyotes were found to be possible candidate  
87 introgressors, showing significant ( $Z > 4.2$ ) positive  $D$  statistics for all Pop2  
88 populations except the New World wolves (Figure 1B). We then tested whether any  
89 domesticated dog populations could act as the candidate introgressor for the CTVT  
90 founder. Consistent with above results, we find that present-day arctic sled dogs  
91 showed significant ( $Z > 9.6$ ) positive  $D(\text{CTVT founder, Pop2; Sled dog1, Andean Fox})$   
92 statistics for all Pop2 populations (Figure 1C).  $D$  statistics suggest that the CTVT  
93 founder was an arctic sled dog bearing gene flow from a population most closely  
94 related to coyotes. We did not find strong evidence of coyote introgression into  
95 present-day arctic sled dogs ( $D(\text{Sled dog1, Pop2; Coyote, Andean Fox}) \sim 0$ ). Finally,  
96 we used high frequency coyote private alleles to genotype the CTVT founder, in order  
97 to manually check whether there was any evidence of continuous coyote-related  
98 segments introgressed into the CTVT founder (Supplementary Note) and found one  
99 segment longer than 3Mbps on chromosome 6, and several shorter segments on  
100 chromosomes 6, 25 and 26. (Figure 1D). This finding helps us to reject the hypothesis  
101 that our results were caused by somatic reverse mutations, rather than introgression.  
102 29 protein coding genes are located within these segments in total. Among them, we  
103 found four tumor-related genes<sup>10, 11</sup> and a domestication gene<sup>12</sup> *AMY2B* (Figure 1D).

104 The presence of coyote genotypes at tumor-related genes may contribute to the  
105 genetic susceptibility to CTVT tumorigenesis. The coyote genotypes at *AMY2B* may  
106 lead to low adaptation on a diet rich in starch and the disappearance of the population  
107 represented by the CTVT founder in agrarian age.

108

109 In conclusion, our detailed analyses reveal that the CTVT founder came from an  
110 arctic sled dog population that possessed introgression from a population related to  
111 coyotes, a result that was not known in previous studies. Considering the habitat of  
112 coyotes in North America<sup>13</sup>, we propose two hypotheses: 1) The CTVT founder lived  
113 in the arctic region of North America. 2) The CTVT founder lived in the arctic region  
114 of the Far East, where arctic dogs possessing the introgressed segments migrated  
115 through the Bering Strait in an unknown period. Hence, an ancient story of canine  
116 admixture is hidden in the genome of a living fossil, the CTVT. To further test our  
117 hypotheses of ancient admixture and to better understand the detailed evolutionary  
118 history of dogs from the arctic region and Americas, it is crucial to acquire ancient  
119 samples in these regions in future work.

120

## 121 **Acknowledgments**

122 We thank Melinda A. Yang for her valuable comments, Newton O. Otecko for  
123 providing dog samples from Kenya, Ming-Shan Wang for collecting dog samples  
124 from Sri Lanka, Shi-Fang Wu for collecting other dog samples, Qi-Jun Zhou for  
125 collecting CTVT samples and laboratory work, and the BIG Data Center in Beijing

126 Institute of Genomics, Chinese Academy of Sciences (CAS) for usage of their  
 127 high-performance computing platform. This work was supported by the Strategic  
 128 Priority Research Program (B) (XDB13000000) of the CAS, National Natural Science  
 129 Foundation of China (91531303, 91731303, 41672021, and 41630102). Q.F. is  
 130 supported by CAS (XDA19050102, QYZDB-SSW-DQC003, and XDPB05), and the  
 131 Howard Hughes Medical Institute (grant number 55008731). G.D.W. is supported by  
 132 the Youth Innovation Promotion Association, CAS.

133

134

## 135 **References**

- 136 1 Yang MA, Fu Q. Insights into Modern Human Prehistory Using Ancient Genomes.  
 137 *Trends in Genetics* 2018; **34**:184-196.
- 138 2 Marciniak S, Perry GH. Harnessing ancient genomes to study the history of human  
 139 adaptation. *Nature Reviews Genetics* 2017; **18**:659.
- 140 3 Ostrander EA, Wayne RK, Freedman AH, Davis BW. Demographic history,  
 141 selection and functional diversity of the canine genome. *Nature Reviews Genetics*  
 142 2017; **18**:705.
- 143 4 Freedman AH, Wayne RK. Deciphering the Origin of Dogs: From Fossils to  
 144 Genomes. *Annual Review of Animal Biosciences* 2017; **5**:281-307.
- 145 5 Wang G-D, Zhai W, Yang H-C *et al.* Out of southern East Asia: the natural history  
 146 of domestic dogs across the world. *Cell Research* 2015; **26**:21.
- 147 6 Botigué LR, Song S, Scheu A *et al.* Ancient European dog genomes reveal

- continuity since the Early Neolithic. *Nature Communications* 2017; **8**:16082.
- 7 Murchison EP, Wedge DC, Alexandrov LB *et al.* Transmissible dog cancer genome reveals the origin and history of an ancient cell lineage. *Science* 2014; **343**:437-440.
- 8 Decker B, Davis BW, Rimbault M *et al.* Comparison against 186 canid whole-genome sequences reveals survival strategies of an ancient clonally transmissible canine tumor. *Genome research* 2015; **25**:1646-1655.
- 9 Murgia C, Pritchard JK, Kim SY, Fassati A, Weiss RA. Clonal origin and evolution of a transmissible cancer. *Cell* 2006; **126**:477-487.
- 10 An O, Dall'Olio GM, Mourikis TP, Ciccarelli FD. NCG 5.0: updates of a manually curated repository of cancer genes and associated properties from cancer mutational screenings. *Nucleic Acids Research* 2016; **44**:D992-D999.
- 11 Zhao M, Sun J, Zhao Z. TSGene: a web resource for tumor suppressor genes. *Nucleic Acids Research* 2013; **41**:D970-D976.
- 12 Arendt M, Cairns KM, Ballard JWO, Savolainen P, Axelsson E. Diet adaptation in dog reflects spread of prehistoric agriculture. *Heredity* 2016; **117**:301.
- 13 vonHoldt BM, Cahill JA, Fan Z *et al.* Whole-genome sequence analysis shows that two endemic species of North American wolf are admixtures of the coyote and gray wolf. *Science Advances* 2016; **2**.

## 168 **Figure Legends**

169 **Figure 1.** Analyses of introgression into the CTVT founder. **(A)** ADMIXTURE  
 170 analysis result ( $K=3$ ) for jackal, coyote, gray wolf and dog populations with 163K  
 171 SNPs pruned by linkage disequilibrium. Colors indicate different ancestral  
 172 components. **(B)**  $D(\text{Pop1}, \text{Pop2}; \text{Coyote}, \text{Andean Fox})$ , with the Z-score given on the  
 173 x axis. When the CTVT founder is Pop2,  $Z>3$  for all Pop1 groups except the  
 174 New-World wolf which is a descendant of coyotes. **(C)**  $D(\text{CTVT founder}, \text{Pop2}; \text{Pop3},$   
 175  $\text{Andean Fox})$ , with the Z-score given on the x axis. When present-day arctic sled dogs  
 176 and coyotes are Pop3,  $Z>3$  scores for all Pop2 groups. **(D)** Introgressed segments (red  
 177 regions) traced by high frequency coyote private allele positions (blue regions), see  
 178 Supplementary Note. Genes within introgressed segments were labeled alongside  
 179 ideogram of chromosomes. Copy number loss regions on chromosome 6 were  
 180 truncated for clarity.



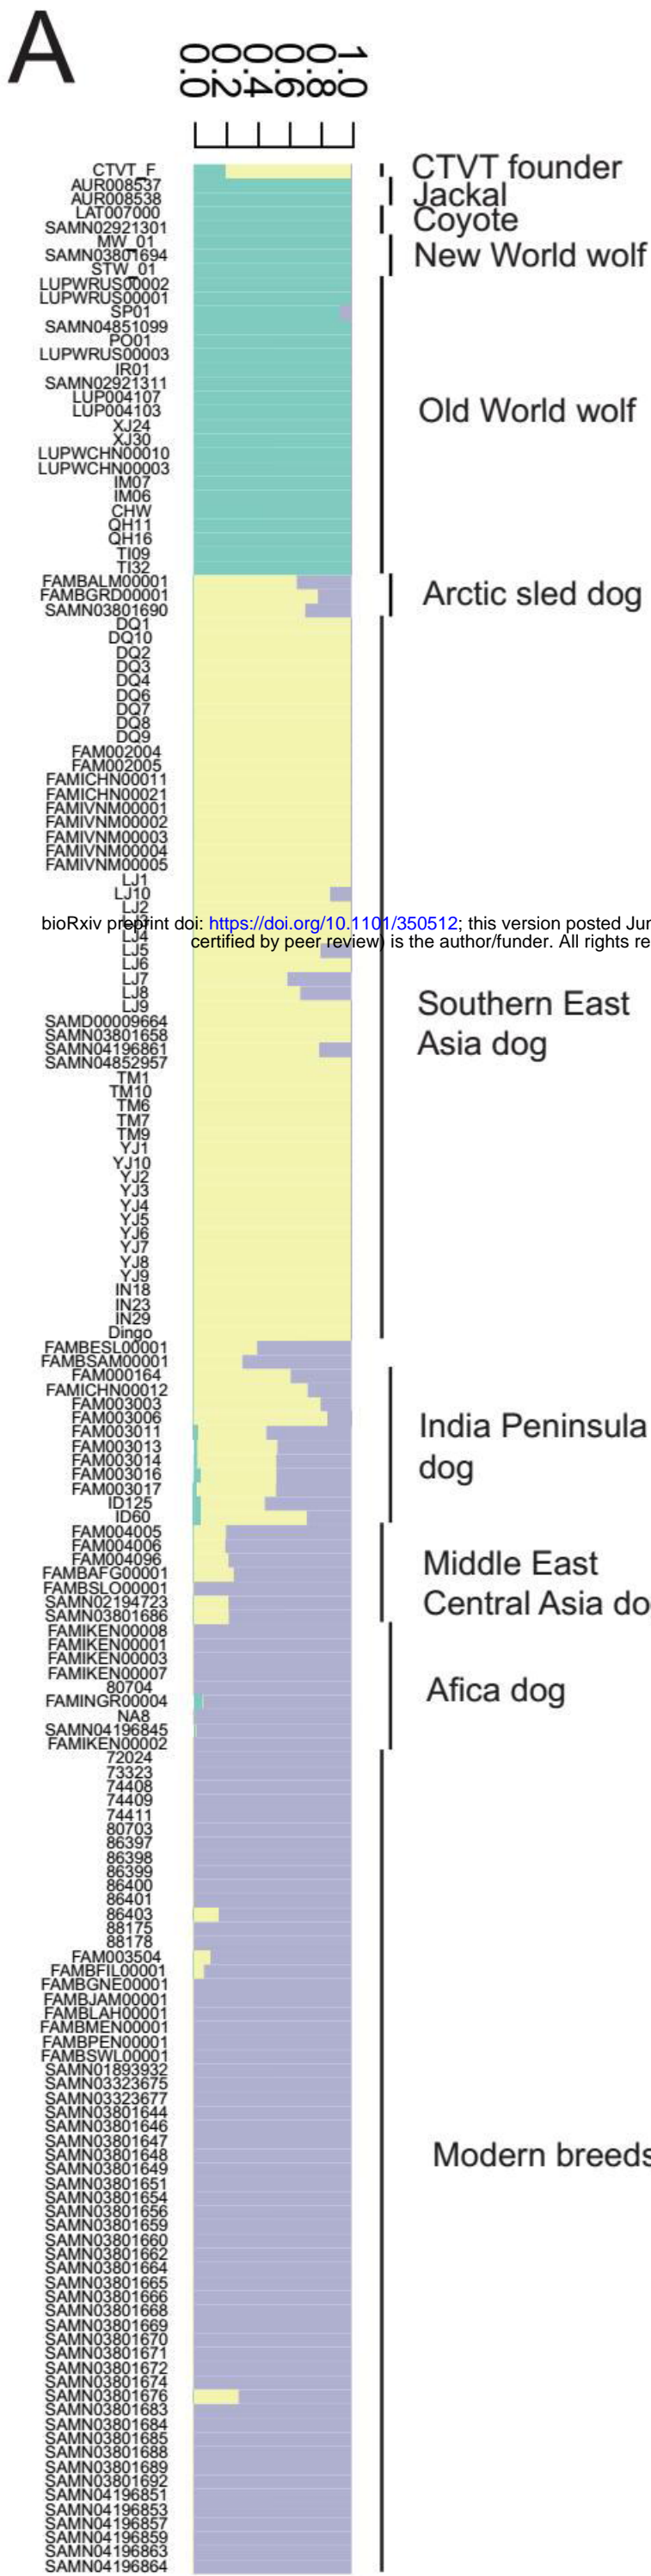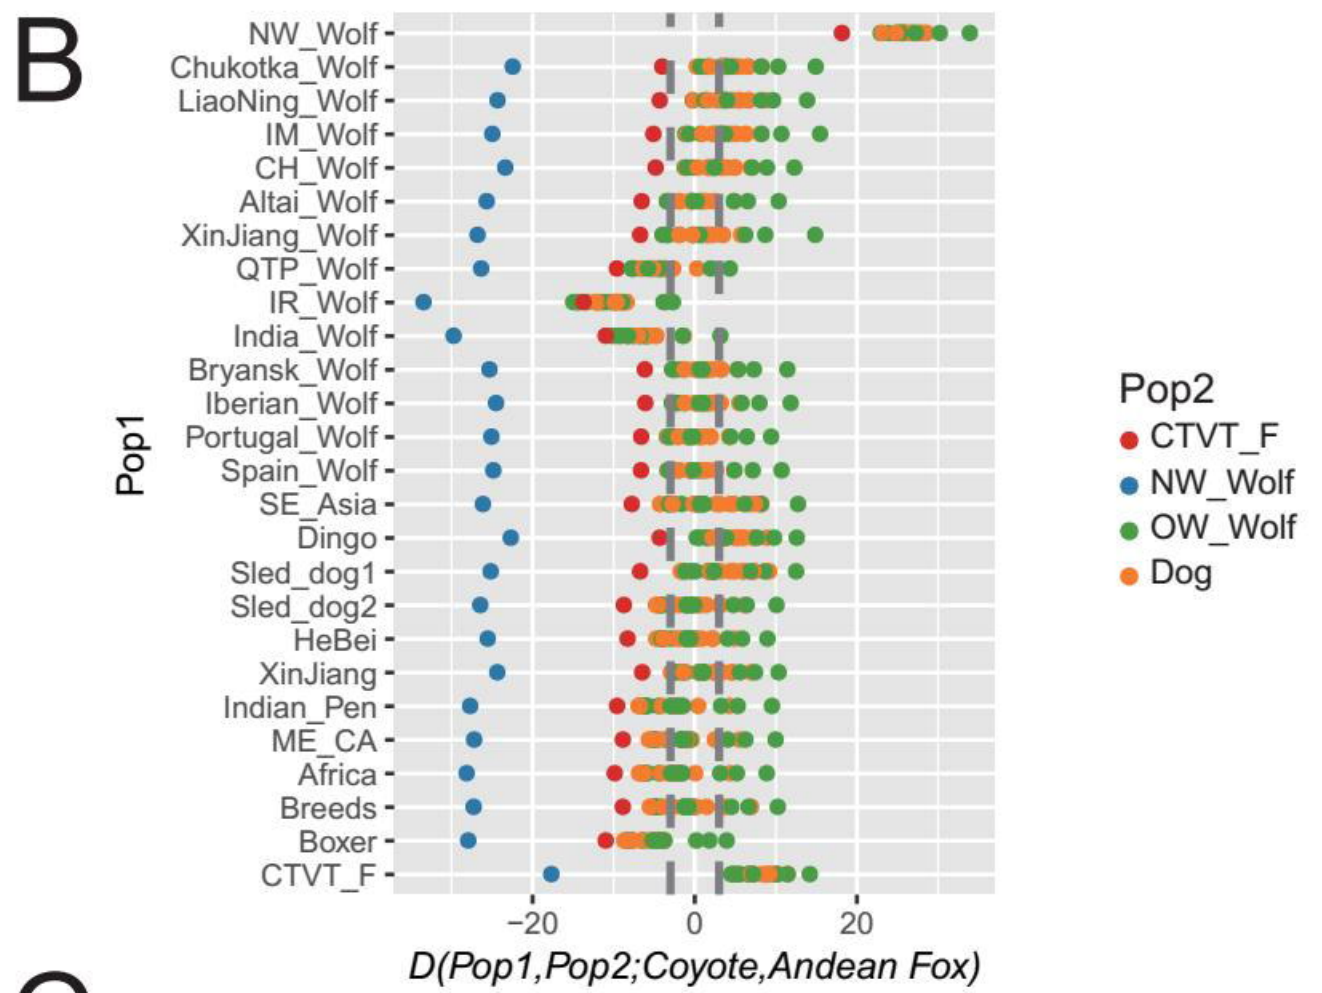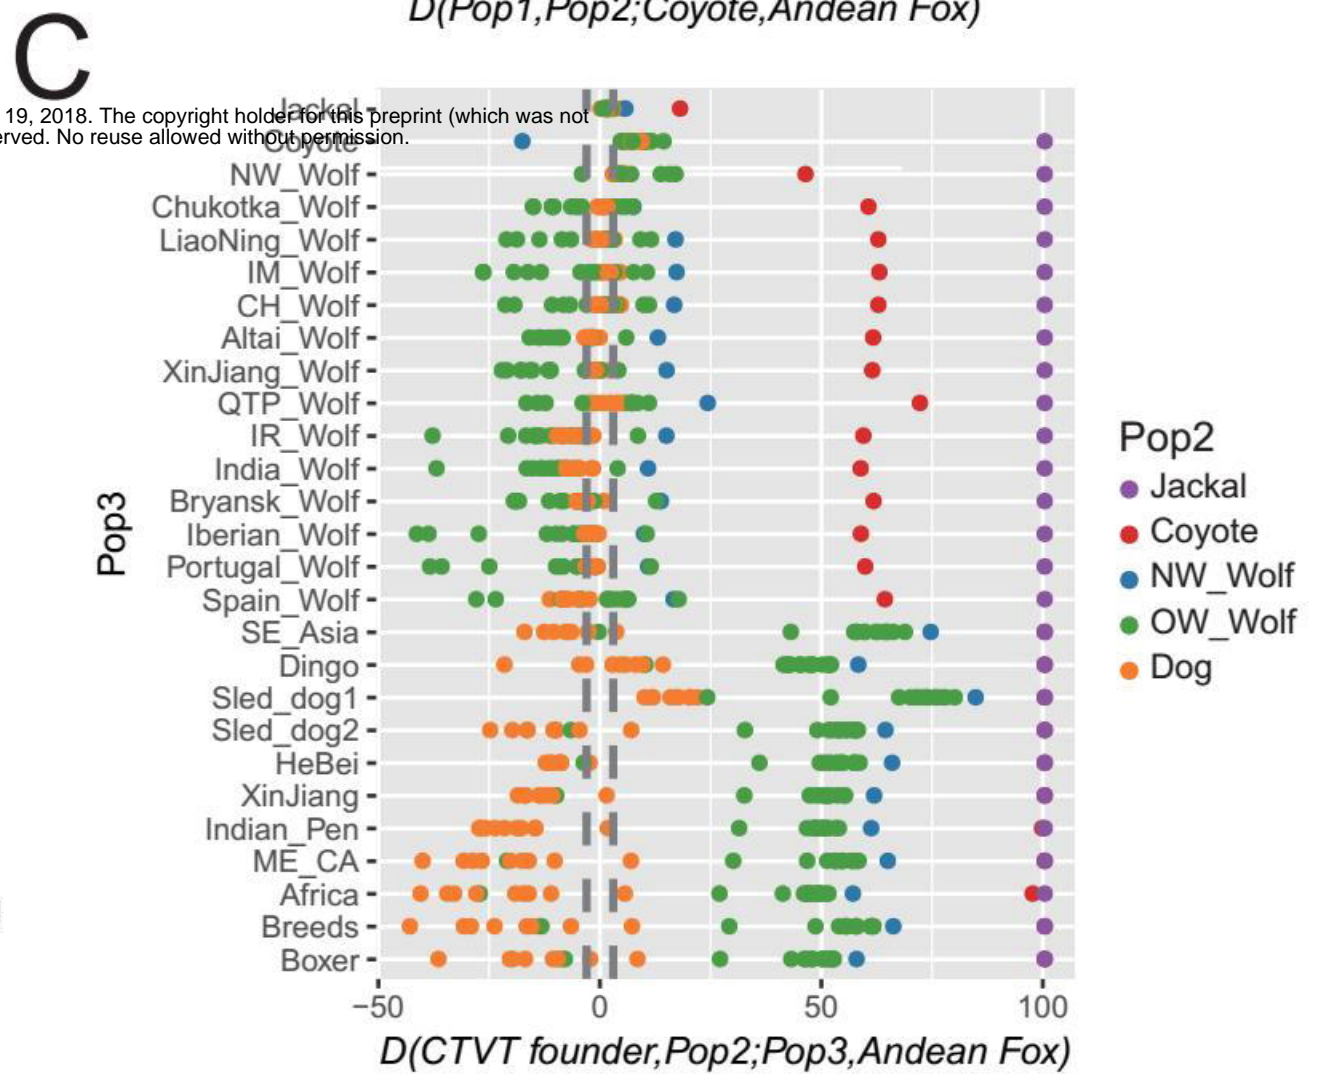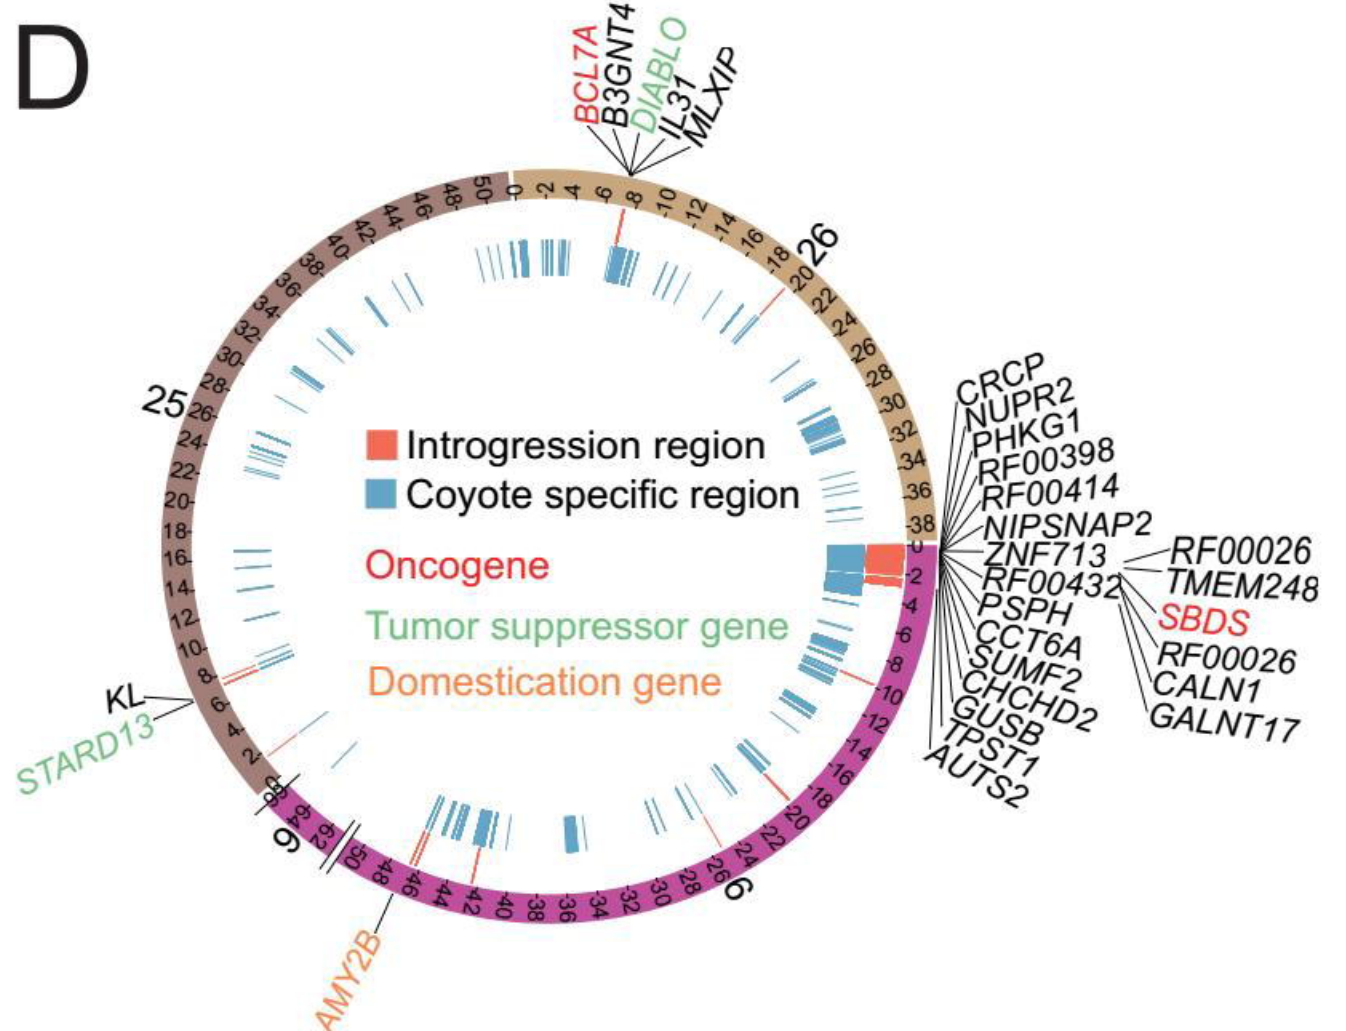

Source: https://www.biorxiv.org/content/biorxiv/early/2018/06/19/350512.full.pdf
